# Supplementary material for: A bimodal theranostic nanodelivery system based on [graphene oxide-chlorogenic acid-gadolinium/gold] nanoparticles
Source: PLoS One. 2018 Jul 25;13(7):e0200760. doi: 10.1371/journal.pone.0200760 (PMC6059483; doi:10.1371/journal.pone.0200760)
Supplement: S2 Fig — (XLSX) [file pone.0200760.s002.xlsx]

## Sheet: @@@GOGdGAAu
399.199	94.3924
401.128	97.0097
403.056	99.2727
404.985	99.2868
406.913	98.202
408.842	96.4757
410.77	95.6003
412.699	94.7726
414.627	93.5992
416.556	92.6359
418.484	92.0668
420.413	91.5325
422.341	91.0491
424.27	90.6864
426.198	90.2396
428.127	89.4474
430.055	88.5619
431.984	87.8493
433.912	87.3629
435.841	86.7117
437.769	86.0914
439.698	85.4788
441.626	84.9869
443.555	84.6401
445.483	84.1105
447.412	83.3199
449.34	82.5619
451.269	81.9025
453.197	81.2343
455.126	80.524
457.054	79.8839
458.983	79.4069
460.911	78.9089
462.84	78.4472
464.768	78.1597
466.697	77.9626
468.625	77.8785
470.554	77.9286
472.482	77.9264
474.411	77.8474
476.339	77.9401
478.268	78.0879
480.196	78.2346
482.125	78.3377
484.053	78.4032
485.982	78.4815
487.91	78.5092
489.839	78.4729
491.767	78.4536
493.696	78.4468
495.624	78.5421
497.553	78.7086
499.481	78.8853
501.41	79.0532
503.338	79.2359
505.267	79.2949
507.195	79.2846
509.124	79.2898
511.052	79.346
512.981	79.36
514.909	79.3154
516.838	79.2663
518.766	79.3248
520.695	79.4664
522.623	79.666
524.552	79.8556
526.48	80.0492
528.409	80.1936
530.337	80.2657
532.266	80.2786
534.194	80.2843
536.123	80.2769
538.051	80.242
539.98	80.1338
541.908	80.0332
543.837	79.9882
545.765	79.978
547.693	79.9331
549.622	79.7609
551.551	79.3949
553.479	78.8553
555.408	78.1284
557.336	77.2924
559.264	76.4848
561.193	75.7841
563.121	75.1698
565.05	74.7026
566.979	74.4604
568.907	74.5105
570.836	74.8335
572.764	75.3869
574.693	76.0644
576.621	76.7751
578.55	77.4736
580.478	78.1225
582.407	78.6886
584.335	79.1921
586.264	79.6498
588.192	79.9784
590.12	80.0162
592.049	79.7472
593.977	79.198
595.906	78.4965
597.835	77.7679
599.763	77.142
601.692	76.6774
603.62	76.4272
605.548	76.4269
607.477	76.6452
609.405	77.0835
611.334	77.7212
613.263	78.4514
615.191	79.1514
617.12	79.718
619.048	80.1375
620.976	80.3904
622.905	80.5459
624.833	80.6662
626.762	80.822
628.691	80.9907
630.619	81.1685
632.548	81.3341
634.476	81.5092
636.404	81.7331
638.333	82.0005
640.261	82.278
642.19	82.5898
644.119	82.9159
646.047	83.2512
647.976	83.5456
649.904	83.7942
651.832	83.9969
653.761	84.2183
655.689	84.4317
657.618	84.549
659.546	84.5861
661.475	84.6297
663.403	84.7014
665.332	84.7952
667.26	84.8978
669.189	85.0163
671.117	85.1262
673.046	85.2706
674.975	85.4347
676.903	85.607
678.832	85.7503
680.76	85.9094
682.688	86.0584
684.617	86.1231
686.545	86.1776
688.474	86.2559
690.403	86.3502
692.331	86.4778
694.26	86.594
696.188	86.7186
698.116	86.8726
700.045	87.0437
701.973	87.1836
703.902	87.2965
705.83	87.409
707.759	87.5101
709.687	87.5761
711.616	87.6259
713.544	87.6548
715.473	87.6939
717.401	87.7548
719.33	87.8584
721.258	87.9715
723.187	88.1081
725.115	88.2519
727.044	88.3761
728.972	88.4778
730.901	88.5944
732.829	88.7191
734.758	88.7896
736.686	88.8149
738.615	88.8469
740.543	88.8625
742.472	88.8802
744.4	88.8923
746.329	88.9165
748.257	88.9278
750.186	88.916
752.114	88.8821
754.043	88.8379
755.971	88.7679
757.9	88.7019
759.828	88.6155
761.757	88.5109
763.685	88.3731
765.614	88.2252
767.542	88.0685
769.471	87.9167
771.399	87.7571
773.328	87.5929
775.256	87.4065
777.185	87.2112
779.113	87.0086
781.042	86.8292
782.97	86.676
784.899	86.5455
786.827	86.4098
788.756	86.2809
790.684	86.1577
792.613	86.0827
794.541	86.0571
796.47	86.0756
798.398	86.1278
800.327	86.2318
802.255	86.3834
804.184	86.5695
806.112	86.7877
808.041	87.0483
809.969	87.3156
811.898	87.5498
813.826	87.7174
815.755	87.8166
817.683	87.8556
819.612	87.8645
821.54	87.8148
823.469	87.7046
825.397	87.5341
827.326	87.3282
829.254	87.0703
831.183	86.7653
833.111	86.4288
835.04	86.0653
836.968	85.6674
838.897	85.2413
840.825	84.7789
842.754	84.2902
844.682	83.7682
846.611	83.2221
848.539	82.6302
850.468	81.9992
852.396	81.3298
854.325	80.6305
856.253	79.893
858.182	79.1303
860.11	78.329
862.039	77.4752
863.967	76.552
865.896	75.5805
867.824	74.5857
869.753	73.5975
871.681	72.6316
873.61	71.7184
875.538	70.8731
877.467	70.1182
879.395	69.4439
881.324	68.8361
883.252	68.2781
885.181	67.751
887.109	67.2125
889.038	66.6366
890.966	66.0177
892.895	65.3812
894.823	64.7386
896.752	64.1126
898.68	63.5034
900.609	62.925
902.537	62.3805
904.466	61.876
906.394	61.3976
908.323	60.9456
910.251	60.5207
912.18	60.1277
914.108	59.757
916.037	59.4099
917.965	59.0874
919.894	58.7873
921.822	58.4993
923.751	58.2311
925.679	57.9734
927.608	57.7321
929.536	57.5055
931.465	57.2952
933.393	57.09
935.322	56.9055
937.25	56.7466
939.179	56.6012
941.107	56.463
943.036	56.3402
944.964	56.2305
946.893	56.1369
948.821	56.0562
950.75	55.9668
952.678	55.8569
954.607	55.7526
956.535	55.6639
958.464	55.5996
960.392	55.5624
962.321	55.5656
964.249	55.5897
966.178	55.6226
968.106	55.6613
970.035	55.7071
971.963	55.7419
973.892	55.7477
975.82	55.7021
977.749	55.5926
979.677	55.4361
981.606	55.2538
983.534	55.0417
985.463	54.8077
987.391	54.5515
989.32	54.2725
991.248	53.9598
993.177	53.6164
995.105	53.2334
997.034	52.8137
998.962	52.3443
1000.89	51.8227
1002.82	51.2495
1004.75	50.6373
1006.68	49.9799
1008.61	49.2696
1010.53	48.5089
1012.46	47.692
1014.39	46.7933
1016.32	45.7894
1018.25	44.6558
1020.18	43.379
1022.1	41.9562
1024.03	40.4343
1025.96	38.877
1027.89	37.3502
1029.82	35.9049
1031.75	34.5955
1033.67	33.4693
1035.6	32.5639
1037.53	31.8946
1039.46	31.445
1041.39	31.1731
1043.32	31.0301
1045.25	30.9611
1047.17	30.9214
1049.1	30.888
1051.03	30.8665
1052.96	30.8522
1054.89	30.833
1056.82	30.7983
1058.75	30.7549
1060.67	30.7192
1062.6	30.6975
1064.53	30.6951
1066.46	30.7259
1068.39	30.8119
1070.32	30.9629
1072.24	31.17
1074.17	31.4145
1076.1	31.6541
1078.03	31.8449
1079.96	31.952
1081.89	31.9621
1083.82	31.8768
1085.74	31.7173
1087.67	31.5068
1089.6	31.2682
1091.53	31.0358
1093.46	30.8578
1095.39	30.7755
1097.32	30.8023
1099.24	30.9328
1101.17	31.1474
1103.1	31.4121
1105.03	31.7137
1106.96	32.04
1108.89	32.3879
1110.82	32.7649
1112.74	33.1667
1114.67	33.5786
1116.6	33.9882
1118.53	34.3873
1120.46	34.7728
1122.39	35.1383
1124.32	35.4789
1126.24	35.788
1128.17	36.0608
1130.1	36.2957
1132.03	36.4969
1133.96	36.6679
1135.89	36.8138
1137.81	36.9438
1139.74	37.0627
1141.67	37.1721
1143.6	37.2749
1145.53	37.3754
1147.46	37.4875
1149.38	37.6135
1151.31	37.7575
1153.24	37.917
1155.17	38.0968
1157.1	38.2976
1159.03	38.5201
1160.96	38.7646
1162.88	39.0284
1164.81	39.3156
1166.74	39.628
1168.67	39.9572
1170.6	40.2992
1172.53	40.6504
1174.46	41.0118
1176.38	41.3739
1178.31	41.7325
1180.24	42.0823
1182.17	42.429
1184.1	42.7703
1186.03	43.1059
1187.95	43.4316
1189.88	43.7547
1191.81	44.0697
1193.74	44.3728
1195.67	44.666
1197.6	44.9522
1199.53	45.2295
1201.45	45.4962
1203.38	45.7534
1205.31	46.0031
1207.24	46.2391
1209.17	46.4679
1211.1	46.6901
1213.03	46.9043
1214.95	47.1088
1216.88	47.3144
1218.81	47.5129
1220.74	47.6973
1222.67	47.8691
1224.6	48.0364
1226.53	48.2011
1228.45	48.3634
1230.38	48.5271
1232.31	48.6952
1234.24	48.8663
1236.17	49.0483
1238.1	49.2335
1240.03	49.4229
1241.95	49.6205
1243.88	49.8237
1245.81	50.0209
1247.74	50.2107
1249.67	50.3932
1251.6	50.5791
1253.52	50.764
1255.45	50.9435
1257.38	51.1125
1259.31	51.2738
1261.24	51.4241
1263.17	51.5684
1265.1	51.6972
1267.02	51.8167
1268.95	51.926
1270.88	52.0228
1272.81	52.1009
1274.74	52.1645
1276.67	52.2059
1278.59	52.2295
1280.52	52.2304
1282.45	52.2071
1284.38	52.1516
1286.31	52.0679
1288.24	51.9519
1290.16	51.8072
1292.09	51.6294
1294.02	51.4228
1295.95	51.1897
1297.88	50.9435
1299.81	50.6828
1301.74	50.4059
1303.66	50.1159
1305.59	49.8289
1307.52	49.5322
1309.45	49.2234
1311.38	48.9094
1313.31	48.6043
1315.24	48.3121
1317.16	48.0453
1319.09	47.8098
1321.02	47.6052
1322.95	47.4313
1324.88	47.2966
1326.81	47.1793
1328.73	47.0211
1330.66	46.8322
1332.59	46.6199
1334.52	46.3522
1336.45	46.0416
1338.38	45.6917
1340.31	45.3095
1342.23	44.9072
1344.16	44.4863
1346.09	44.0528
1348.02	43.6284
1349.95	43.2276
1351.88	42.8165
1353.81	42.3912
1355.73	41.9543
1357.66	41.5331
1359.59	41.1396
1361.52	40.7819
1363.45	40.4302
1365.38	40.0923
1367.31	39.8179
1369.23	39.6142
1371.16	39.2917
1373.09	38.6765
1375.02	37.8716
1376.95	37.1292
1378.88	36.5179
1380.81	36.1164
1382.73	35.937
1384.66	35.9425
1386.59	36.142
1388.52	36.5137
1390.45	37.0323
1392.38	37.6998
1394.3	38.4622
1396.23	39.1797
1398.16	39.628
1400.09	39.7838
1402.02	39.8825
1403.95	40.0928
1405.88	40.3627
1407.8	40.6359
1409.73	40.9071
1411.66	41.1716
1413.59	41.4292
1415.52	41.6886
1417.45	41.9701
1419.38	42.2442
1421.3	42.5191
1423.23	42.82
1425.16	43.1214
1427.09	43.415
1429.02	43.7269
1430.95	44.0511
1432.87	44.3816
1434.8	44.6853
1436.73	44.9833
1438.66	45.2721
1440.59	45.5504
1442.52	45.8416
1444.44	46.1723
1446.37	46.3929
1448.3	46.5821
1450.23	46.7792
1452.16	46.9872
1454.09	47.1619
1456.02	47.3369
1457.94	47.5206
1459.87	47.7595
1461.8	47.9583
1463.73	48.1411
1465.66	48.3133
1467.59	48.5165
1469.52	48.7293
1471.44	48.9242
1473.37	49.0138
1475.3	49.1441
1477.23	49.2934
1479.16	49.3897
1481.09	49.3877
1483.02	49.4003
1484.94	49.4093
1486.87	49.383
1488.8	49.2268
1490.73	49.0267
1492.66	48.8231
1494.59	48.7567
1496.52	48.4818
1498.44	48.1523
1500.37	47.7871
1502.3	47.4359
1504.23	47.0767
1506.16	46.6191
1508.09	46.1956
1510.01	45.7783
1511.94	45.2645
1513.87	44.7364
1515.8	44.1615
1517.73	43.5922
1519.66	43.1158
1521.59	42.6966
1523.51	41.9794
1525.44	41.3398
1527.37	40.8356
1529.3	40.2158
1531.23	39.5174
1533.16	38.7356
1535.09	37.9628
1537.01	37.1851
1538.94	36.3658
1540.87	35.6202
1542.8	34.8551
1544.73	34.1495
1546.66	33.5964
1548.58	32.9317
1550.51	32.2133
1552.44	31.6254
1554.37	31.0696
1556.3	30.3732
1558.23	29.682
1560.15	28.9829
1562.08	28.3405
1564.01	27.8101
1565.94	27.2363
1567.87	26.7153
1569.8	26.2273
1571.73	25.8084
1573.65	25.4294
1575.58	24.9489
1577.51	24.5524
1579.44	24.2222
1581.37	23.9216
1583.3	23.7011
1585.23	23.4744
1587.15	23.2764
1589.08	23.1418
1591.01	23.0322
1592.94	22.881
1594.87	22.7641
1596.8	22.6638
1598.72	22.5785
1600.65	22.498
1602.58	22.4474
1604.51	22.4109
1606.44	22.3606
1608.37	22.3193
1610.3	22.3037
1612.22	22.2915
1614.15	22.304
1616.08	22.3451
1618.01	22.4189
1619.94	22.5375
1621.87	22.7166
1623.8	22.9284
1625.72	23.1773
1627.65	23.4815
1629.58	23.8568
1631.51	24.2955
1633.44	24.7687
1635.37	25.29
1637.3	25.8846
1639.22	26.5569
1641.15	27.1888
1643.08	27.8835
1645.01	28.641
1646.94	29.4791
1648.87	30.3682
1650.8	31.2812
1652.72	32.2573
1654.65	33.3213
1656.58	34.4079
1658.51	35.5616
1660.44	36.7582
1662.37	37.9801
1664.29	39.2597
1666.22	40.5938
1668.15	41.8781
1670.08	43.2974
1672.01	44.6909
1673.94	46.1632
1675.87	47.6514
1677.79	49.1672
1679.72	50.7317
1681.65	52.3331
1683.58	53.8683
1685.51	55.3961
1687.44	56.8655
1689.37	58.2105
1691.29	59.4576
1693.22	60.6319
1695.15	61.6554
1697.08	62.5821
1699.01	63.334
1700.94	64.0783
1702.86	64.754
1704.79	65.4043
1706.72	65.9437
1708.65	66.4512
1710.58	66.9232
1712.51	67.4103
1714.43	67.9017
1716.36	68.4099
1718.29	68.9723
1720.22	69.6342
1722.15	70.2885
1724.08	71.0189
1726.01	71.8393
1727.93	72.7808
1729.86	73.78
1731.79	74.815
1733.72	75.8132
1735.65	76.8931
1737.58	77.9683
1739.51	79.0235
1741.43	80.035
1743.36	81.0735
1745.29	82.0657
1747.22	83.0228
1749.15	83.8795
1751.08	84.659
1753.01	85.3523
1754.93	85.9927
1756.86	86.513
1758.79	87.0233
1760.72	87.4038
1762.65	87.6547
1764.58	87.7481
1766.51	87.7831
1768.43	87.7576
1770.36	87.7123
1772.29	87.6155
1774.22	87.494
1776.15	87.3349
1778.08	87.1894
1780	87.0561
1781.93	86.9086
1783.86	86.7139
1785.79	86.5574
1787.72	86.328
1789.65	86.0724
1791.58	85.8061
1793.5	85.5826
1795.43	85.3624
1797.36	85.1757
1799.29	85.0124
1801.22	84.8423
1803.15	84.7008
1805.07	84.6341
1807	84.5424
1808.93	84.4085
1810.86	84.2853
1812.79	84.1904
1814.72	84.0508
1816.65	83.9226
1818.57	83.7304
1820.5	83.5105
1822.43	83.2911
1824.36	83.0861
1826.29	82.8271
1828.22	82.532
1830.14	82.2624
1832.07	82.0229
1834	81.7214
1835.93	81.4126
1837.86	81.0937
1839.79	80.7824
1841.72	80.4469
1843.64	80.1549
1845.57	79.8055
1847.5	79.4663
1849.43	79.1458
1851.36	78.8333
1853.29	78.5082
1855.21	78.2359
1857.14	77.9751
1859.07	77.6683
1861	77.2872
1862.93	76.9253
1864.86	76.5648
1866.79	76.2318
1868.71	75.9055
1870.64	75.6062
1872.57	75.3096
1874.5	75.0241
1876.43	74.7576
1878.36	74.4967
1880.29	74.232
1882.21	73.9984
1884.14	73.7012
1886.07	73.3805
1888	73.0727
1889.93	72.7857
1891.86	72.4994
1893.79	72.2262
1895.71	71.9623
1897.64	71.7138
1899.57	71.4506
1901.5	71.1943
1903.43	70.9498
1905.36	70.7129
1907.29	70.452
1909.21	70.2192
1911.14	69.9656
1913.07	69.7055
1915	69.4455
1916.93	69.1927
1918.86	68.942
1920.78	68.7078
1922.71	68.4732
1924.64	68.2402
1926.57	67.9966
1928.5	67.7766
1930.43	67.5701
1932.36	67.3688
1934.28	67.1338
1936.21	66.9129
1938.14	66.6771
1940.07	66.4333
1942	66.2017
1943.93	65.9844
1945.86	65.7673
1947.78	65.5575
1949.71	65.3422
1951.64	65.136
1953.57	64.9397
1955.5	64.7535
1957.43	64.5463
1959.35	64.3285
1961.28	64.1046
1963.21	63.8904
1965.14	63.6811
1967.07	63.4797
1969	63.2818
1970.92	63.089
1972.85	62.8921
1974.78	62.7072
1976.71	62.5151
1978.64	62.3326
1980.57	62.1536
1982.5	61.9567
1984.42	61.7511
1986.35	61.5617
1988.28	61.3709
1990.21	61.1893
1992.14	61.0079
1994.07	60.8312
1996	60.6539
1997.92	60.4855
1999.85	60.3183
2001.78	60.1607
2003.71	60.0053
2005.64	59.8599
2007.57	59.7015
2009.49	59.5371
2011.42	59.3745
2013.35	59.2171
2015.28	59.0523
2017.21	58.8927
2019.14	58.732
2021.07	58.5757
2022.99	58.4234
2024.92	58.2805
2026.85	58.1394
2028.78	58.0083
2030.71	57.8762
2032.64	57.7409
2034.57	57.5999
2036.49	57.4647
2038.42	57.3284
2040.35	57.1984
2042.28	57.0668
2044.21	56.9376
2046.14	56.8062
2048.07	56.681
2049.99	56.5579
2051.92	56.4434
2053.85	56.3217
2055.78	56.1971
2057.71	56.0657
2059.64	55.9414
2061.57	55.8205
2063.49	55.7039
2065.42	55.5853
2067.35	55.473
2069.28	55.3596
2071.21	55.2455
2073.14	55.1293
2075.06	55.0202
2076.99	54.9148
2078.92	54.8162
2080.85	54.7092
2082.78	54.602
2084.71	54.4925
2086.64	54.3869
2088.56	54.2786
2090.49	54.173
2092.42	54.0689
2094.35	53.9729
2096.28	53.8759
2098.21	53.7801
2100.14	53.6846
2102.06	53.598
2103.99	53.5112
2105.92	53.4237
2107.85	53.3292
2109.78	53.2358
2111.71	53.1381
2113.63	53.043
2115.56	52.9454
2117.49	52.8488
2119.42	52.7506
2121.35	52.6589
2123.28	52.5681
2125.2	52.483
2127.13	52.3948
2129.06	52.3075
2130.99	52.2182
2132.92	52.1356
2134.85	52.0537
2136.78	51.9762
2138.7	51.8979
2140.63	51.8255
2142.56	51.7539
2144.49	51.6822
2146.42	51.6057
2148.35	51.5313
2150.28	51.4509
2152.2	51.368
2154.13	51.2803
2156.06	51.1957
2157.99	51.112
2159.92	51.0365
2161.85	50.9628
2163.78	50.8899
2165.7	50.8175
2167.63	50.7536
2169.56	50.69
2171.49	50.6249
2173.42	50.5519
2175.35	50.4781
2177.28	50.4033
2179.2	50.3305
2181.13	50.2567
2183.06	50.1864
2184.99	50.1183
2186.92	50.0599
2188.85	49.9974
2190.77	49.9295
2192.7	49.8587
2194.63	49.7894
2196.56	49.7148
2198.49	49.6394
2200.42	49.5618
2202.34	49.4874
2204.27	49.4133
2206.2	49.3422
2208.13	49.2722
2210.06	49.2082
2211.99	49.1439
2213.92	49.0792
2215.84	49.0059
2217.77	48.9308
2219.7	48.854
2221.63	48.7796
2223.56	48.7035
2225.49	48.6298
2227.42	48.5564
2229.34	48.487
2231.27	48.4157
2233.2	48.347
2235.13	48.278
2237.06	48.2121
2238.99	48.1449
2240.91	48.0812
2242.84	48.0144
2244.77	47.9464
2246.7	47.8781
2248.63	47.8114
2250.56	47.7408
2252.49	47.6733
2254.41	47.6059
2256.34	47.5409
2258.27	47.471
2260.2	47.4001
2262.13	47.3266
2264.06	47.2557
2265.99	47.1869
2267.91	47.1225
2269.84	47.0527
2271.77	46.9843
2273.7	46.9179
2275.63	46.8519
2277.56	46.7857
2279.49	46.7253
2281.41	46.6641
2283.34	46.6017
2285.27	46.5354
2287.2	46.4693
2289.13	46.3959
2291.06	46.3206
2292.99	46.2449
2294.91	46.1725
2296.84	46.0958
2298.77	46.0192
2300.7	45.9364
2302.63	45.8517
2304.56	45.7678
2306.48	45.6903
2308.41	45.6077
2310.34	45.5242
2312.27	45.4286
2314.2	45.3261
2316.13	45.2169
2318.05	45.1095
2319.98	44.998
2321.91	44.8818
2323.84	44.763
2325.77	44.6511
2327.7	44.5313
2329.63	44.4196
2331.55	44.3139
2333.48	44.2023
2335.41	44.0688
2337.34	43.9575
2339.27	43.8902
2341.2	43.8654
2343.12	43.84
2345.05	43.7935
2346.98	43.7178
2348.91	43.6332
2350.84	43.5227
2352.77	43.3826
2354.7	43.2236
2356.62	43.0551
2358.55	42.888
2360.48	42.7429
2362.41	42.6303
2364.34	42.6048
2366.27	42.6597
2368.2	42.752
2370.12	42.8431
2372.05	42.9401
2373.98	43.0424
2375.91	43.1445
2377.84	43.2124
2379.77	43.2544
2381.7	43.2814
2383.62	43.2834
2385.55	43.2764
2387.48	43.262
2389.41	43.2216
2391.34	43.1767
2393.27	43.1241
2395.2	43.0641
2397.12	42.9994
2399.05	42.9396
2400.98	42.8818
2402.91	42.8288
2404.84	42.7769
2406.77	42.7259
2408.7	42.6736
2410.62	42.6241
2412.55	42.5746
2414.48	42.5162
2416.41	42.4476
2418.34	42.3805
2420.26	42.3125
2422.19	42.2414
2424.12	42.1701
2426.05	42.1066
2427.98	42.0444
2429.91	41.9875
2431.84	41.9334
2433.76	41.8816
2435.69	41.8312
2437.62	41.7861
2439.55	41.7374
2441.48	41.681
2443.41	41.6215
2445.34	41.5647
2447.26	41.5071
2449.19	41.4478
2451.12	41.3871
2453.05	41.3311
2454.98	41.2751
2456.91	41.2205
2458.84	41.1624
2460.76	41.105
2462.69	41.0491
2464.62	40.9932
2466.55	40.9367
2468.48	40.8843
2470.41	40.8346
2472.34	40.7848
2474.26	40.7327
2476.19	40.6818
2478.12	40.6279
2480.05	40.5746
2481.98	40.522
2483.91	40.4631
2485.83	40.3983
2487.76	40.3387
2489.69	40.2822
2491.62	40.226
2493.55	40.1672
2495.48	40.1077
2497.41	40.0453
2499.33	39.9813
2501.26	39.9177
2503.19	39.8568
2505.12	39.7933
2507.05	39.7319
2508.98	39.6768
2510.91	39.6246
2512.83	39.5741
2514.76	39.5291
2516.69	39.4868
2518.62	39.4454
2520.55	39.3968
2522.48	39.3468
2524.4	39.2966
2526.33	39.2452
2528.26	39.1925
2530.19	39.1402
2532.12	39.0833
2534.05	39.0293
2535.97	38.9779
2537.9	38.9276
2539.83	38.8739
2541.76	38.8224
2543.69	38.7747
2545.62	38.7284
2547.55	38.6768
2549.47	38.6281
2551.4	38.5822
2553.33	38.536
2555.26	38.4882
2557.19	38.438
2559.12	38.3846
2561.05	38.3358
2562.97	38.2866
2564.9	38.2356
2566.83	38.1833
2568.76	38.136
2570.69	38.0863
2572.62	38.0371
2574.55	37.989
2576.47	37.9457
2578.4	37.9046
2580.33	37.8614
2582.26	37.817
2584.19	37.7722
2586.12	37.7289
2588.05	37.6878
2589.97	37.6409
2591.9	37.5879
2593.83	37.5324
2595.76	37.4776
2597.69	37.4179
2599.62	37.3599
2601.54	37.3042
2603.47	37.253
2605.4	37.2041
2607.33	37.1542
2609.26	37.1064
2611.19	37.0607
2613.11	37.0113
2615.04	36.963
2616.97	36.9147
2618.9	36.8641
2620.83	36.8115
2622.76	36.758
2624.69	36.7027
2626.61	36.6527
2628.54	36.6064
2630.47	36.5614
2632.4	36.5141
2634.33	36.469
2636.26	36.4251
2638.19	36.382
2640.11	36.3341
2642.04	36.2899
2643.97	36.2466
2645.9	36.1994
2647.83	36.1457
2649.76	36.0869
2651.68	36.0263
2653.61	35.9677
2655.54	35.9072
2657.47	35.8489
2659.4	35.7909
2661.33	35.736
2663.26	35.6832
2665.18	35.6315
2667.11	35.5833
2669.04	35.5414
2670.97	35.4988
2672.9	35.45
2674.83	35.3953
2676.76	35.3441
2678.68	35.2985
2680.61	35.2512
2682.54	35.2002
2684.47	35.1481
2686.4	35.0894
2688.33	35.0273
2690.26	34.9675
2692.18	34.9095
2694.11	34.8517
2696.04	34.7949
2697.97	34.7353
2699.9	34.6757
2701.83	34.6225
2703.76	34.5753
2705.68	34.5266
2707.61	34.4736
2709.54	34.4181
2711.47	34.3619
2713.4	34.305
2715.33	34.2513
2717.25	34.1986
2719.18	34.1455
2721.11	34.0926
2723.04	34.0435
2724.97	33.9967
2726.9	33.9512
2728.82	33.9035
2730.75	33.8528
2732.68	33.7986
2734.61	33.7431
2736.54	33.6866
2738.47	33.6316
2740.4	33.5806
2742.32	33.5338
2744.25	33.4839
2746.18	33.4315
2748.11	33.3792
2750.04	33.3316
2751.97	33.2841
2753.9	33.232
2755.82	33.1776
2757.75	33.1288
2759.68	33.0766
2761.61	33.0199
2763.54	32.9662
2765.47	32.9194
2767.39	32.8757
2769.32	32.8322
2771.25	32.7809
2773.18	32.7241
2775.11	32.67
2777.04	32.6232
2778.97	32.5722
2780.89	32.5196
2782.82	32.4681
2784.75	32.4182
2786.68	32.3634
2788.61	32.3095
2790.54	32.2614
2792.47	32.2174
2794.39	32.1745
2796.32	32.1311
2798.25	32.0804
2800.18	32.0311
2802.11	31.9885
2804.04	31.9434
2805.97	31.8915
2807.89	31.8412
2809.82	31.7849
2811.75	31.7248
2813.68	31.6677
2815.61	31.6148
2817.54	31.5616
2819.47	31.5109
2821.39	31.4598
2823.32	31.4098
2825.25	31.3566
2827.18	31.306
2829.11	31.2506
2831.04	31.1828
2832.96	31.1154
2834.89	31.0626
2836.82	31.0161
2838.75	30.9672
2840.68	30.9076
2842.61	30.8339
2844.53	30.7524
2846.46	30.6704
2848.39	30.584
2850.32	30.5039
2852.25	30.4307
2854.18	30.3634
2856.11	30.2978
2858.03	30.2419
2859.96	30.2038
2861.89	30.1836
2863.82	30.1714
2865.75	30.1525
2867.68	30.1252
2869.61	30.0932
2871.53	30.0572
2873.46	30.0174
2875.39	29.9743
2877.32	29.9359
2879.25	29.8996
2881.18	29.8636
2883.11	29.8234
2885.03	29.7816
2886.96	29.7341
2888.89	29.6828
2890.82	29.6331
2892.75	29.5835
2894.68	29.5289
2896.6	29.4652
2898.53	29.3942
2900.46	29.3195
2902.39	29.2445
2904.32	29.1678
2906.25	29.0862
2908.18	29.0013
2910.1	28.9106
2912.03	28.8184
2913.96	28.7231
2915.89	28.6287
2917.82	28.5389
2919.75	28.4547
2921.68	28.3767
2923.6	28.3119
2925.53	28.2609
2927.46	28.2208
2929.39	28.1894
2931.32	28.1602
2933.25	28.132
2935.18	28.1055
2937.1	28.077
2939.03	28.0447
2940.96	28.0058
2942.89	27.9646
2944.82	27.919
2946.75	27.8667
2948.67	27.8118
2950.6	27.7603
2952.53	27.7109
2954.46	27.658
2956.39	27.6011
2958.32	27.5409
2960.24	27.4791
2962.17	27.418
2964.1	27.3605
2966.03	27.3072
2967.96	27.257
2969.89	27.2107
2971.82	27.1611
2973.74	27.1059
2975.67	27.0529
2977.6	26.999
2979.53	26.9404
2981.46	26.8786
2983.39	26.812
2985.32	26.738
2987.24	26.6605
2989.17	26.584
2991.1	26.5111
2993.03	26.4401
2994.96	26.3678
2996.89	26.2968
2998.82	26.2265
3000.74	26.1541
3002.67	26.0786
3004.6	25.9982
3006.53	25.9146
3008.46	25.8342
3010.39	25.7538
3012.31	25.6713
3014.24	25.5849
3016.17	25.4982
3018.1	25.4178
3020.03	25.3384
3021.96	25.2564
3023.89	25.1815
3025.81	25.1089
3027.74	25.0322
3029.67	24.9518
3031.6	24.8721
3033.53	24.7868
3035.46	24.7053
3037.39	24.6259
3039.31	24.5451
3041.24	24.4645
3043.17	24.3809
3045.1	24.2971
3047.03	24.2139
3048.96	24.1287
3050.89	24.0472
3052.81	23.9699
3054.74	23.8946
3056.67	23.8154
3058.6	23.734
3060.53	23.6534
3062.46	23.5799
3064.38	23.5082
3066.31	23.44
3068.24	23.3725
3070.17	23.295
3072.1	23.2181
3074.03	23.147
3075.95	23.0684
3077.88	22.9869
3079.81	22.9077
3081.74	22.8257
3083.67	22.7391
3085.6	22.6512
3087.53	22.5674
3089.45	22.488
3091.38	22.4099
3093.31	22.336
3095.24	22.2633
3097.17	22.1921
3099.1	22.1233
3101.03	22.0508
3102.95	21.9719
3104.88	21.8974
3106.81	21.8285
3108.74	21.7563
3110.67	21.6758
3112.6	21.592
3114.53	21.5127
3116.45	21.4362
3118.38	21.363
3120.31	21.2932
3122.24	21.2213
3124.17	21.1526
3126.1	21.0876
3128.02	21.0238
3129.95	20.9623
3131.88	20.9054
3133.81	20.8484
3135.74	20.7834
3137.67	20.7131
3139.59	20.6431
3141.52	20.5709
3143.45	20.4948
3145.38	20.4219
3147.31	20.3472
3149.24	20.271
3151.17	20.2015
3153.09	20.1358
3155.02	20.0706
3156.95	20.0022
3158.88	19.9331
3160.81	19.8688
3162.74	19.8132
3164.67	19.7637
3166.59	19.7109
3168.52	19.6514
3170.45	19.5905
3172.38	19.532
3174.31	19.4672
3176.24	19.3948
3178.16	19.3199
3180.09	19.2435
3182.02	19.1719
3183.95	19.1028
3185.88	19.0356
3187.81	18.9746
3189.74	18.9226
3191.66	18.8774
3193.59	18.8339
3195.52	18.7883
3197.45	18.7445
3199.38	18.6974
3201.31	18.6444
3203.24	18.5865
3205.16	18.5335
3207.09	18.4871
3209.02	18.442
3210.95	18.3943
3212.88	18.3454
3214.81	18.2985
3216.74	18.2574
3218.66	18.2224
3220.59	18.1945
3222.52	18.1667
3224.45	18.1367
3226.38	18.1052
3228.31	18.0768
3230.24	18.0483
3232.16	18.0233
3234.09	17.9972
3236.02	17.9716
3237.95	17.9452
3239.88	17.9227
3241.81	17.907
3243.73	17.8953
3245.66	17.8804
3247.59	17.8622
3249.52	17.8412
3251.45	17.8185
3253.38	17.7956
3255.3	17.7746
3257.23	17.7549
3259.16	17.7375
3261.09	17.7216
3263.02	17.7106
3264.95	17.6964
3266.88	17.6827
3268.8	17.6696
3270.73	17.6524
3272.66	17.6277
3274.59	17.5929
3276.52	17.5551
3278.45	17.5207
3280.38	17.4854
3282.3	17.4514
3284.23	17.419
3286.16	17.3817
3288.09	17.3462
3290.02	17.3134
3291.95	17.2771
3293.88	17.2382
3295.8	17.1952
3297.73	17.15
3299.66	17.0969
3301.59	17.0415
3303.52	17.0018
3305.45	16.9741
3307.38	16.9446
3309.3	16.9069
3311.23	16.8676
3313.16	16.8228
3315.09	16.7795
3317.02	16.7312
3318.95	16.6747
3320.87	16.6169
3322.8	16.555
3324.73	16.491
3326.66	16.4231
3328.59	16.3601
3330.52	16.3078
3332.45	16.2539
3334.37	16.1906
3336.3	16.12
3338.23	16.0499
3340.16	15.9796
3342.09	15.9151
3344.02	15.8514
3345.95	15.7896
3347.87	15.7358
3349.8	15.6788
3351.73	15.6215
3353.66	15.5703
3355.59	15.5244
3357.52	15.4837
3359.44	15.4415
3361.37	15.3958
3363.3	15.3542
3365.23	15.3154
3367.16	15.2797
3369.09	15.2524
3371.01	15.2264
3372.94	15.1912
3374.87	15.1535
3376.8	15.1186
3378.73	15.0978
3380.66	15.0898
3382.59	15.0886
3384.51	15.0914
3386.44	15.0919
3388.37	15.0986
3390.3	15.1179
3392.23	15.1423
3394.16	15.1627
3396.09	15.1831
3398.01	15.2051
3399.94	15.2224
3401.87	15.2454
3403.8	15.2753
3405.73	15.3057
3407.66	15.3424
3409.59	15.3894
3411.51	15.4365
3413.44	15.4892
3415.37	15.5515
3417.3	15.6215
3419.23	15.6954
3421.16	15.77
3423.09	15.8492
3425.01	15.9371
3426.94	16.0269
3428.87	16.1252
3430.8	16.2178
3432.73	16.3083
3434.66	16.419
3436.58	16.5276
3438.51	16.633
3440.44	16.7519
3442.37	16.8706
3444.3	16.9856
3446.23	17.1079
3448.16	17.2477
3450.08	17.4003
3452.01	17.5572
3453.94	17.7231
3455.87	17.9124
3457.8	18.1061
3459.73	18.3056
3461.66	18.5167
3463.58	18.7194
3465.51	18.9242
3467.44	19.1447
3469.37	19.3587
3471.3	19.5571
3473.23	19.7631
3475.15	19.9803
3477.08	20.1863
3479.01	20.3888
3480.94	20.6047
3482.87	20.8377
3484.8	21.0779
3486.72	21.3295
3488.65	21.6011
3490.58	21.8814
3492.51	22.149
3494.44	22.4205
3496.37	22.6952
3498.3	22.9636
3500.22	23.2375
3502.15	23.5123
3504.08	23.783
3506.01	24.0639
3507.94	24.3533
3509.87	24.665
3511.8	24.992
3513.72	25.3338
3515.65	25.679
3517.58	26.0079
3519.51	26.3107
3521.44	26.6191
3523.37	26.9605
3525.3	27.3069
3527.22	27.6528
3529.15	28.0103
3531.08	28.3919
3533.01	28.8004
3534.94	29.2141
3536.87	29.6213
3538.8	30.0408
3540.72	30.4631
3542.65	30.8637
3544.58	31.264
3546.51	31.6814
3548.44	32.1168
3550.36	32.5569
3552.29	33.0076
3554.22	33.4978
3556.15	33.9506
3558.08	34.3897
3560.01	34.8379
3561.94	35.3003
3563.86	35.7847
3565.79	36.3195
3567.72	36.8747
3569.65	37.4335
3571.58	38.039
3573.51	38.7395
3575.44	39.5029
3577.36	40.2139
3579.29	40.938
3581.22	41.6765
3583.15	42.3524
3585.08	43.0327
3587.01	43.7815
3588.94	44.5711
3590.86	45.3628
3592.79	46.1784
3594.72	47.0754
3596.65	47.9527
3598.58	48.8292
3600.51	49.8157
3602.43	50.8025
3604.36	51.7448
3606.29	52.7779
3608.22	53.8062
3610.15	54.8193
3612.08	55.8523
3614.01	56.9865
3615.93	58.3154
3617.86	59.5193
3619.79	60.706
3621.72	61.9664
3623.65	63.1545
3625.58	64.3858
3627.51	65.7198
3629.43	67.0892
3631.36	68.4448
3633.29	69.8348
3635.22	71.3192
3637.15	72.9826
3639.08	74.4312
3641.01	75.7634
3642.93	77.1755
3644.86	78.293
3646.79	79.3133
3648.72	80.3112
3650.65	81.2309
3652.58	82.1085
3654.5	82.9025
3656.43	83.8526
3658.36	84.5851
3660.29	85.1348
3662.22	86.0954
3664.15	86.8845
3666.07	87.1531
3668	87.3129
3669.93	87.458
3671.86	87.4784
3673.79	87.4223
3675.72	87.6214
3677.65	87.8453
3679.57	87.8776
3681.5	87.8047
3683.43	87.847
3685.36	87.618
3687.29	87.4442
3689.22	87.7046
3691.15	87.6372
3693.07	87.4094
3695	87.1777
3696.93	87.0729
3698.86	87.2238
3700.79	87.2926
3702.72	87.3793
3704.65	87.2811
3706.57	87.0025
3708.5	86.7162
3710.43	86.5678
3712.36	86.4294
3714.29	86.3517
3716.22	86.1528
3718.14	85.9361
3720.07	85.8498
3722	85.9608
3723.93	86.093
3725.86	86.0142
3727.79	85.5816
3729.72	85.1134
3731.64	84.922
3733.57	84.5726
3735.5	84.2459
3737.43	84.2481
3739.36	84.1605
3741.29	83.8616
3743.22	83.4907
3745.14	83.4236
3747.07	83.5168
3749	83.5199
3750.93	83.3361
3752.86	83.2084
3754.79	83.1223
3756.72	83.2578
3758.64	83.461
3760.57	83.4033
3762.5	83.5003
3764.43	83.7608
3766.36	83.8762
3768.29	83.7869
3770.21	83.6801
3772.14	83.6973
3774.07	83.6316
3776	83.462
3777.93	83.3537
3779.86	83.3078
3781.78	83.1919
3783.71	83.3224
3785.64	83.2529
3787.57	83.2445
3789.5	83.3227
3791.43	83.2152
3793.36	83.2807
3795.28	83.213
3797.21	83.0002
3799.14	82.8205
3801.07	82.5823
3803	82.6146
3804.93	82.5045
3806.86	82.4377
3808.78	82.6746
3810.71	82.7596
3812.64	82.6747
3814.57	82.6948
3816.5	82.5743
3818.43	82.4076
3820.36	82.4293
3822.28	82.3483
3824.21	82.2155
3826.14	82.236
3828.07	82.1812
3830	82.1911
3831.93	81.976
3833.86	81.8661
3835.78	81.8745
3837.71	81.6288
3839.64	81.8596
3841.57	82.0804
3843.5	82.0374
3845.43	82.0008
3847.35	81.8821
3849.28	81.9208
3851.21	82.1214
3853.14	82.2094
3855.07	81.9974
3857	82.0408
3858.93	81.9288
3860.85	81.9178
3862.78	81.9826
3864.71	82.0649
3866.64	82.5043
3868.57	82.7334
3870.5	82.6097
3872.43	82.6335
3874.35	82.5815
3876.28	82.5847
3878.21	82.7536
3880.14	82.7712
3882.07	82.6815
3884	82.752
3885.92	82.6847
3887.85	82.7317
3889.78	82.6764
3891.71	82.7438
3893.64	82.8896
3895.57	82.9452
3897.49	82.9044
3899.42	83.0153
3901.35	82.9568
3903.28	83.0752
3905.21	83.3458
3907.14	83.4245
3909.07	83.3404
3910.99	83.3899
3912.92	83.5829
3914.85	83.7053
3916.78	83.8591
3918.71	84.0584
3920.64	84.032
3922.57	83.9338
3924.49	83.8961
3926.42	83.9046
3928.35	83.9546
3930.28	84.1329
3932.21	84.1629
3934.14	84.1352
3936.07	84.1389
3937.99	84.2164
3939.92	84.2836
3941.85	84.3261
3943.78	84.4131
3945.71	84.4945
3947.64	84.5632
3949.57	84.6218
3951.49	84.6823
3953.42	84.7673
3955.35	84.9073
3957.28	85.0433
3959.21	85.0632
3961.14	85.1466
3963.06	85.3034
3964.99	85.4282
3966.92	85.5305
3968.85	85.6582
3970.78	85.7803
3972.71	85.9145
3974.64	86.0583
3976.56	86.1813
3978.49	86.2387
3980.42	86.2988
3982.35	86.3486
3984.28	86.3204
3986.21	86.2531
3988.14	86.2599
3990.06	86.2475
3991.99	86.2701
3993.92	86.3026
3995.85	86.5043
3997.78	86.8744
3999.71	87.2662
4001.63	0
